# Supplementary material for: Advances in psoriasis and gut microorganisms with co-metabolites
Source: Front Microbiol. 2023 Nov 16;14:1192543. doi: 10.3389/fmicb.2023.1192543 (PMC10687559; doi:10.3389/fmicb.2023.1192543)
Supplement: Supplementary file 1 [file Table_1.XLSX]

## Sheet: Sheet1
country	region1	region2	prevalence_Overall	prevalence_Adults	prevalence_Children
Australia	Australasia	Australasia	1.88	2.38	0.27
Norway	Western Europe	Europe	1.86	2.36	0.26
Israel	Western Europe	Europe	1.81	2.28	0.26
Denmark	Western Europe	Europe	1.79	2.26	0.25
Romania	Central Europe	Europe	1.77	2.24	0.25
Germany	Western Europe	Europe	1.74	2.2	0.25
Sweden	Western Europe	Europe	1.66	2.1	0.23
Poland	Central Europe	Europe	1.63	2.06	0.23
Italy	Western Europe	Europe	1.58	2	0.22
New Zealand	Australasia	Australasia	1.58	1.99	0.22
France	Western Europe	Europe	1.53	1.94	0.22
Austria	Western Europe	Europe	1.52	1.92	0.21
Belgium	Western Europe	Europe	1.52	1.92	0.21
Cyprus	Western Europe	Europe	1.52	1.92	0.21
Finland	Western Europe	Europe	1.52	1.92	0.21
Greece	Western Europe	Europe	1.52	1.92	0.21
Iceland	Western Europe	Europe	1.52	1.92	0.21
Ireland	Western Europe	Europe	1.52	1.92	0.21
Luxembourg	Western Europe	Europe	1.52	1.92	0.21
Switzerland	Western Europe	Europe	1.52	0.11	-
United Kingdom	Western Europe	Europe	1.52	1.92	0.21
Slovenia	Central Europe	Europe	1.47	1.86	0.21
Albania	Central Europe	Europe	1.45	1.83	0.2
Bosnia and Herz.	Central Europe	Europe	1.45	1.83	0.2
Bulgaria	Central Europe	Europe	1.45	1.83	0.2
Czech Rep.	Central Europe	Europe	1.45	1.83	0.2
Hungary	Central Europe	Europe	1.45	1.83	0.2
Macedonia	Central Europe	Europe	1.45	1.83	0.2
Montenegro	Central Europe	Europe	1.45	1.83	0.2
Serbia	Central Europe	Europe	1.45	1.83	0.2
Slovakia	Central Europe	Europe	1.45	1.83	0.2
Netherlands	Western Europe	Europe	1.43	1.81	0.21
Croatia	Central Europe	Europe	1.36	1.72	0.19
Canada	High-income North America	America	1.34	1.7	0.19
Portugal	Western Europe	Europe	1.23	1.56	0.17
Greenland	High-income North America	America	1.18	1.5	0.17
United States	High-income North America	America	1.12	1.42	0.16
Spain	Western Europe	Europe	1.11	1.4	0.16
Argentina	High-income Southern Latin America	America	0.87	1.1	0.12
Chile	High-income Southern Latin America	America	0.87	1.1	0.12
Uruguay	High-income Southern Latin America	America	0.87	1.1	0.12
Armenia	Central Asia	Asia	0.68	0.86	0.1
Azerbaijan	Central Asia	Asia	0.68	0.86	0.1
Georgia	Central Asia	Asia	0.68	0.86	0.1
Kazakhstan	Central Asia	Asia	0.68	0.86	0.1
Kyrgyzstan	Central Asia	Asia	0.68	0.86	0.1
Mongolia	Central Asia	Asia	0.68	0.86	0.1
Tajikistan	Central Asia	Asia	0.68	0.86	0.1
Turkmenistan	Central Asia	Asia	0.68	0.86	0.1
Uzbekistan	Central Asia	Asia	0.68	0.86	0.1
Brazil	Tropical Latin America	America	0.64	0.81	0.09
Paraguay	Tropical Latin America	America	0.61	0.78	0.09
Brunei	High-income Asia Pacific	Asia	0.6	0.76	0.08
Saudi Arabia	North Africa and Middle East	Africa	0.58	0.73	0.08
Korea	High-income Asia Pacific	Asia	0.55	0.7	0.08
Bahamas	Caribbean	Caribbean	0.54	0.69	0.08
Belize	Caribbean	Caribbean	0.54	0.69	0.08
Bolivia	Andean Latin America	America	0.54	0.69	0.08
Colombia	Central Latin America	America	0.54	0.69	0.08
Costa Rica	Central Latin America	America	0.54	0.69	0.08
Cuba	Caribbean	Caribbean	0.54	0.69	0.08
Dominican Rep.	Caribbean	Caribbean	0.54	0.69	0.08
Ecuador	Andean Latin America	America	0.54	0.69	0.08
El Salvador	Central Latin America	America	0.54	0.69	0.08
Guatemala	Central Latin America	America	0.54	0.69	0.08
Guyana	Caribbean	Caribbean	0.54	0.69	0.08
Haiti	Caribbean	Caribbean	0.54	0.69	0.08
Honduras	Central Latin America	America	0.54	0.69	0.08
Jamaica	Caribbean	Caribbean	0.54	0.69	0.08
Japan	High-income Asia Pacific	Asia	0.54	0.68	0.08
Mexico	Central Latin America	America	0.54	0.69	0.08
Nicaragua	Central Latin America	America	0.54	0.69	0.08
Panama	Central Latin America	America	0.54	0.69	0.08
Peru	Andean Latin America	America	0.54	0.69	0.08
Puerto Rico	Caribbean	Caribbean	0.54	0.69	0.08
Suriname	Caribbean	Caribbean	0.54	0.69	0.08
Trinidad and Tobago	Caribbean	Caribbean	0.54	0.69	0.08
Venezuela	Central Latin America	America	0.54	0.69	0.08
Turkey	North Africa and Middle East	Africa	0.49	0.62	0.07
Belarus	Eastern Europe	Europe	0.47	0.59	0.07
Estonia	Eastern Europe	Europe	0.47	0.59	0.07
Iraq	North Africa and Middle East	Africa	0.47	0.6	0.07
Latvia	Eastern Europe	Europe	0.47	0.59	0.07
Lithuania	Eastern Europe	Europe	0.47	0.59	0.07
Moldova	Eastern Europe	Europe	0.47	0.59	0.07
Ukraine	Eastern Europe	Europe	0.47	0.59	0.07
Afghanistan	North Africa and Middle East	Africa	0.45	0.57	0.06
Iran	North Africa and Middle East	Africa	0.45	0.57	0.06
Jordan	North Africa and Middle East	Africa	0.45	0.57	0.06
Kuwait	North Africa and Middle East	Africa	0.45	0.57	0.06
Lebanon	North Africa and Middle East	Africa	0.45	0.57	0.06
Libya	North Africa and Middle East	Africa	0.45	0.57	0.06
Oman	North Africa and Middle East	Africa	0.45	0.57	0.06
Palestine	North Africa and Middle East	Africa	0.45	0.57	0.06
Qatar	North Africa and Middle East	Africa	0.45	0.57	0.06
Sudan	North Africa and Middle East	Africa	0.45	0.57	0.06
Syria	North Africa and Middle East	Africa	0.45	0.57	0.06
Tunisia	North Africa and Middle East	Africa	0.45	0.57	0.06
United Arab Emirates	North Africa and Middle East	Africa	0.45	0.57	0.06
Yemen	North Africa and Middle East	Africa	0.45	0.57	0.06
Algeria	North Africa and Middle East	Africa	0.44	0.55	0.06
Egypt	North Africa and Middle East	Africa	0.4	0.51	0.06
Russia	Eastern Europe	Europe	0.4	0.51	0.06
Morocco	North Africa and Middle East	Africa	0.36	0.46	0.05
Angola	Central sub-Saharan Africa	Africa	0.33	0.41	0.05
Benin	Western sub-Saharan Africa	Africa	0.33	0.41	0.05
Botswana	Southern sub-Saharan Africa	Africa	0.33	0.41	0.05
Burkina Faso	Western sub-Saharan Africa	Africa	0.33	0.41	0.05
Cameroon	Western sub-Saharan Africa	Africa	0.33	0.41	0.05
Central African Rep.	Central sub-Saharan Africa	Africa	0.33	0.41	0.05
Chad	Western sub-Saharan Africa	Africa	0.33	0.41	0.05
Congo	Central sub-Saharan Africa	Africa	0.33	0.41	0.05
Cote d'Ivoire	Western sub-Saharan Africa	Africa	0.33	0.41	0.05
Dem. Rep. Congo	Central sub-Saharan Africa	Africa	0.33	0.41	0.05
Eq. Guinea	Central sub-Saharan Africa	Africa	0.33	0.41	0.05
Gabon	Central sub-Saharan Africa	Africa	0.33	0.41	0.05
Gambia	Western sub-Saharan Africa	Africa	0.33	0.41	0.05
Ghana	Western sub-Saharan Africa	Africa	0.33	0.41	0.05
Guinea	Western sub-Saharan Africa	Africa	0.33	0.41	0.05
Guinea-Bissau	Western sub-Saharan Africa	Africa	0.33	0.41	0.05
Lesotho	Southern sub-Saharan Africa	Africa	0.33	0.41	0.05
Liberia	Western sub-Saharan Africa	Africa	0.33	0.41	0.05
Mali	Western sub-Saharan Africa	Africa	0.33	0.41	0.05
Mauritania	Western sub-Saharan Africa	Africa	0.33	0.41	0.05
Namibia	Southern sub-Saharan Africa	Africa	0.33	0.41	0.05
Niger	Western sub-Saharan Africa	Africa	0.33	0.41	0.05
Nigeria	Western sub-Saharan Africa	Africa	0.33	0.41	0.05
Senegal	Western sub-Saharan Africa	Africa	0.33	0.41	0.05
Sierra Leone	Western sub-Saharan Africa	Africa	0.33	0.41	0.05
South Africa	Southern sub-Saharan Africa	Africa	0.33	0.41	0.05
Swaziland	Southern sub-Saharan Africa	Africa	0.33	0.41	0.05
Togo	Western sub-Saharan Africa	Africa	0.33	0.41	0.05
Zimbabwe	Southern sub-Saharan Africa	Africa	0.33	0.41	0.05
Sri Lanka	Southeast Asia	Asia	0.32	0.4	0.05
Cambodia	Southeast Asia	Asia	0.3	0.38	0.04
Indonesia	Southeast Asia	Asia	0.3	0.38	0.04
Lao PDR	Southeast Asia	Asia	0.3	0.38	0.04
Malaysia	Southeast Asia	Asia	0.3	0.38	0.04
Myanmar	Southeast Asia	Asia	0.3	0.38	0.04
Philippines	Southeast Asia	Asia	0.3	0.38	0.04
Thailand	Southeast Asia	Asia	0.3	0.38	0.04
Timor-Leste	Southeast Asia	Asia	0.3	0.38	0.04
Vietnam	Southeast Asia	Asia	0.3	0.38	0.04
Bangladesh	South Asia	Asia	0.28	0.36	0.04
Bhutan	South Asia	Asia	0.28	0.36	0.04
Nepal	South Asia	Asia	0.28	0.35	0.04
Pakistan	South Asia	Asia	0.28	0.36	0.04
Fiji	Oceania	Oceania	0.27	0.34	0.04
India	South Asia	Asia	0.27	0.34	0.04
Papua New Guinea	Oceania	Oceania	0.27	0.34	0.04
Solomon Is.	Oceania	Oceania	0.27	0.34	0.04
Vanuatu	Oceania	Oceania	0.27	0.34	0.04
Burundi	Eastern sub-Saharan Africa	Africa	0.2	0.26	0.03
Djibouti	Eastern sub-Saharan Africa	Africa	0.2	0.26	0.03
Eritrea	Eastern sub-Saharan Africa	Africa	0.2	0.26	0.03
Ethiopia	Eastern sub-Saharan Africa	Africa	0.2	0.26	0.03
Kenya	Eastern sub-Saharan Africa	Africa	0.2	0.26	0.03
Madagascar	Eastern sub-Saharan Africa	Africa	0.2	0.26	0.03
Malawi	Eastern sub-Saharan Africa	Africa	0.2	0.26	0.03
Mozambique	Eastern sub-Saharan Africa	Africa	0.2	0.26	0.03
Rwanda	Eastern sub-Saharan Africa	Africa	0.2	0.26	0.03
S. Sudan	Eastern sub-Saharan Africa	Africa	0.2	0.26	0.03
Somalia	Eastern sub-Saharan Africa	Africa	0.2	0.26	0.03
Uganda	Eastern sub-Saharan Africa	Africa	0.2	0.26	0.03
Zambia	Eastern sub-Saharan Africa	Africa	0.2	0.26	0.03
Tanzania	Eastern sub-Saharan Africa	Africa	0.18	0.22	0.02
China	East Asia	Asia	0.17	0.21	0.02
Dem. Rep. Korea	East Asia	Asia	0.11	0.14	0.02
Taiwan	East Asia	Asia	0.05	0.07	0.01
